# Supplementary material for: Developing synthetic mucosa-mimetic hydrogels to replace animal experimentation in characterisation of mucoadhesive drug delivery systems
Source: Royal Society of Chemistry journal article supplement (doi:10.1039/c1sm05929g), 2011-01-01
Supplement: c1sm05929g.pdf [file c1sm05929g.pdf]

## Supplementary Material (ESI) for Soft Matter

### Developing synthetic mucosa-mimetic hydrogels to replace animal experimentation in characterisation of mucoadhesive drug delivery systems

Daniel J. Hall,<sup>a</sup> Olga V. Khutoryanskaya<sup>a</sup> and Vitaliy V. Khutoryanskiy<sup>\*a</sup>

<sup>a</sup> Reading School of Pharmacy, University of Reading, Whiteknights, P.O. Box 224, Reading, United Kingdom. Fax: +44 118 378 4703; Tel: +44 118 3786119; E-mail: [v.khutoryanskiy@reading.ac.uk](mailto:v.khutoryanskiy@reading.ac.uk)

#### Experimental Details

##### Materials

Acetonitrile, acryloyl chloride, ammonium persulfate, ethanol, D-glucosamine hydrochloride, 2-hydroxyethyl methacrylate, 2-hydroxyethyl acrylate, N,N'-methylenebisacrylamide, N,N,N',N'-tetramethylethylenediamine and N-vinyl pyrrolidone were used as received from Sigma-Aldrich (UK). Potassium carbonate was used as received from Fisher Scientific (UK). Sorbitol methacrylate was purchased from ABCR (Germany) and used without further purification.

##### *Synthesis of N-acryloyl-D-glucosamine*

N-acryloyl-D-glucosamine was synthesised following the method described by Matsuda et al.<sup>1</sup> D-Glucosamine hydrochloride (8.60 g, 40 mmol) and NaNO<sub>2</sub> (0.14 g, 2.5 mmol) were dissolved in a stirred 2M aqueous solution of K<sub>2</sub>CO<sub>3</sub> (20 mL). The reaction mixture was cooled to 0 °C in a salt and ice bath and acryloyl chloride (4.00 g, 73 mmol) added drop wise, with vigorous stirring while maintaining a reaction temperature below 5 °C. After 3 h, the reaction was slowly warmed to room temperature over 24 h with stirring, then poured into 200 mL of absolute ethanol, refrigerated overnight and the precipitated salts filtered off. The solution was concentrated under vacuum and the product was purified by recrystallisation with methanol/ethyl acetate/diethyl ether. The product yield

was 69 %. The structure of the resulting monomer was confirmed by  $^1\text{H}$  NMR spectroscopy giving signals in agreement with the literature data.<sup>1</sup>

## Synthesis of hydrogels

Ammonium persulfate (APS), water, N,N,N',N'-tetramethylethylenediamine (TMEDA), monomer(s) and N,N'-methylenebisacrylamide (MBA) were added to glass vials in the quantities listed in Table S1. The mixtures were vortexed until complete dissolution of all ingredients. Ethanol was then added before being mixed again and the mixtures were bubbled for 5 minutes with nitrogen. The vials were then sealed and placed in a preheated water bath at 60 °C to initiate polymerisation. Polymerisation was terminated by cooling the reaction mixture down with cold water after 3 hours. The hydrogels were purified by immersing samples in deionised water, which was changed daily, for two weeks to remove any unreacted chemicals.

**Table S1.** Composition of feed mixtures for synthesis of hydrogels

| Sample | Co-monomer(s) | HEMA/co-monomer(s) ratio, mol % | MBA content, mol % | HEMA, g | Co-monomers(s), g | APS, g | TMEDA, g | MBA, g | Ethanol, mL | Water, mL |
|--------|---------------|---------------------------------|--------------------|---------|-------------------|--------|----------|--------|-------------|-----------|
| 1      | -             | 100:0                           | 0.01               | 4.3337  | -                 | 0.0380 | 0.0116   | 0.0005 | 5.25        | 5.25      |
| 2      | -             | 100:0                           | 0.1                | 4.3337  | -                 | 0.0380 | 0.0116   | 0.0052 | 5.25        | 5.25      |
| 3      | -             | 100:0                           | 0.5                | 4.3337  | -                 | 0.0380 | 0.0116   | 0.0257 | 5.25        | 5.25      |
| 4      | -             | 100:0                           | 1.0                | 4.3337  | -                 | 0.0380 | 0.0116   | 0.0513 | 5.25        | 5.25      |
| 5      | NVP           | 70:30                           | 0.1                | 3.0323  | 1.1114            | 0.0380 | 0.0116   | 0.0052 | 5.25        | 5.25      |
| 6      | NVP           | 90:10                           | 0.01               | 3.9050  | 0.3668            | 0.0380 | 0.0116   | 0.0005 | 5.25        | 5.25      |
| 7      | NVP           | 50:50                           | 0.1                | 2.1668  | 1.8505            | 0.0380 | 0.0116   | 0.0052 | 5.25        | 5.25      |
| 8      | HEA           | 70:30                           | 0.1                | 3.0323  | 1.1612            | 0.0380 | 0.0116   | 0.0052 | 5.25        | 5.25      |
| 9      | HEA           | 90:10                           | 0.1                | 3.9050  | 0.3832            | 0.0380 | 0.0116   | 0.0052 | 5.25        | 5.25      |
| 10     | SMA           | 95:5                            | 0.01               | 4.1124  | 0.4016            | 0.0380 | 0.0116   | 0.0005 | 5.25        | 5.25      |
| 11     | SMA           | 90:10                           | 0.1                | 3.9050  | 0.7874            | 0.0380 | 0.0116   | 0.0052 | 5.25        | 5.25      |
| 12     | SMA           | 80:20                           | 0.1                | 3.4711  | 1.5591            | 0.0380 | 0.0116   | 0.0052 | 5.25        | 5.25      |
| 13     | SMA           | 70:30                           | 0.1                | 3.0323  | 2.3622            | 0.0380 | 0.0116   | 0.0052 | 5.25        | 5.25      |
| 14     | NVP:SMA       | 60:20:20                        | 1                  | 2.6028  | 0.7335/1.5591     | 0.0380 | 0.0116   | 0.0513 | 5.25        | 5.25      |
| 15     | AGA           | 90:10                           | 0.1                | 3.9050  | 0.7695            | 0.0380 | 0.0116   | 0.0052 | 5.25        | 5.25      |
| 16     | AGA           | 85:15                           | 0.1                | 3.6830  | 1.1661            | 0.0380 | 0.0116   | 0.0052 | 5.25        | 5.25      |
| 17     | AGA           | 80:20                           | 0.1                | 3.4711  | 1.5393            | 0.0380 | 0.0116   | 0.0052 | 5.25        | 5.25      |
| 18     | AGA           | 70:30                           | 0.1                | 3.0323  | 2.3322            | 0.0380 | 0.0116   | 0.0052 | 5.25        | 5.25      |
| 19     | NVP:AGA       | 80:10:10                        | 0.1                | 3.4711  | 0.3668/0.7696     | 0.0380 | 0.0116   | 0.0052 | 5.25        | 5.25      |

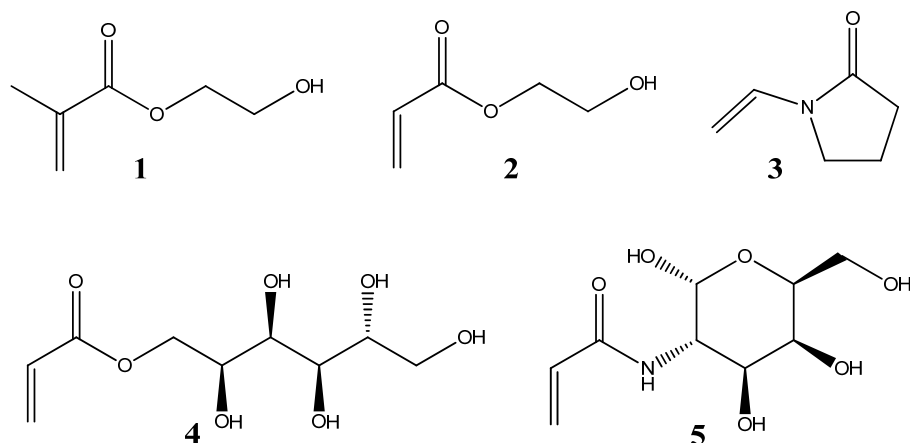

**Figure S1.** Monomers used to synthesise hydrogels: HEMA (1), HEA (2), NVP (3), SMA (4) and AGA (5).

### Mucoadhesive tablet preparation

Model mucoadhesive tablets were prepared by direct compression of powder mixtures. Blends of Carbopol® 940, HPMC and 2.5% w/w magnesium stearate (used as a lubricant) were mixed together in a Willy A. Bachofen AG Maschinenfabrik mixer (Switzerland) and then compressed using a Riva SA Minipress MII single punch tablet press (Argentina). The hardness of the tablets was assessed using a 6D tablet tester, Copley Scientific (UK) and their dimensions measured with a Fowler IP 54 digital micrometer (USA). The tablets had the following characteristics:  $44.2 \pm 1.1$  mg in weight, diameter of  $6.00 \pm 0.01$  mm, thickness of  $2.8 \pm 0.1$  mm and hardness of  $29.0 \pm 3.6$  N.

### Adhesion testing

The adhesive properties of the tablets to the hydrogels were assessed using a TA.XT Plus texture analyser (Stable Micro Systems, UK). The hydrated hydrogels were clamped into a circular holder, immersed in deionised water covering to a depth of 1-2 mm above the hydrogel surface and

equilibrated at  $37 \pm 1$  °C for 0.5 h. The Carbopol®940/HPMC tablets were attached to a mobile probe (cylindrical, P/6) using double sided adhesive tape. The probe was lowered at a speed of 1 mm/s until it reached the hydrogel surface, where it was left in contact for 1 min with a contact force of 0.1 N applied. The probe was then withdrawn at a rate of 0.05 mm/s until complete detachment of the tablet from the hydrogel was observed. The maximum force of detachment and the work of adhesion (the area under the force/distance curve) were determined using Texture Exponent 32 software (Stable Micro Systems, UK). All measurements were performed at least 3 times and the adhesion parameters calculated as mean values  $\pm$  standard deviation.

Adhesion of tablets to animal mucosal tissues were studied using porcine buccal mucosa taken from female Great White pigs weighing 65–75 kg, which were obtained from MutchMeats Ltd (UK). These tissues were collected immediately after the slaughter of animals and were stored frozen at -20 °C. Before testing, the mucosal tissues were defrosted in water at 35–37 °C. The detachment characteristics of mucoadhesive tablets from porcine buccal mucosa are summarised in Figure S2.

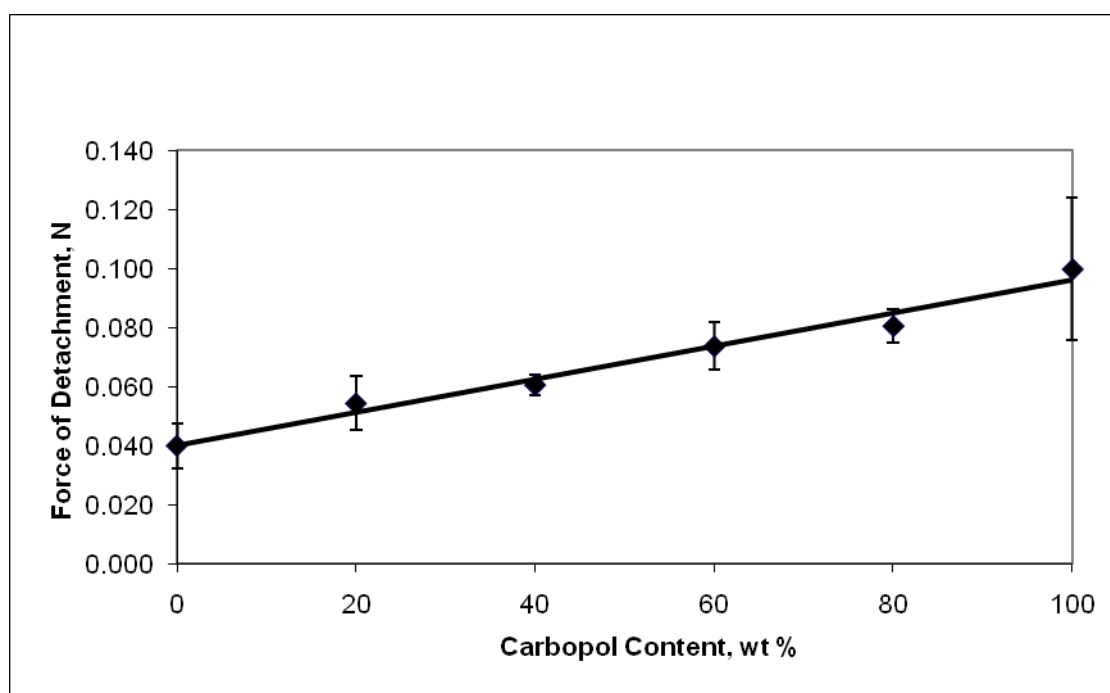

(a)

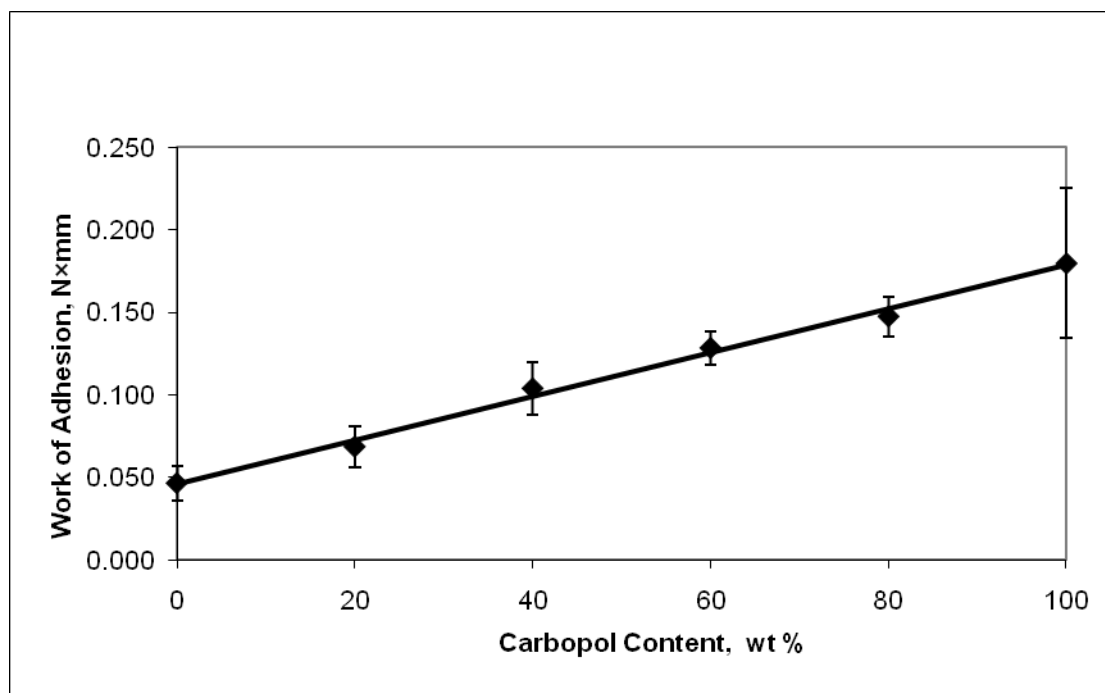

(b)

**Figure S2.** Force of detachment (a) and total work of adhesion (b) for mucoadhesive tablets from porcine buccal mucosa vs Carbopol®940 content in the tablets.

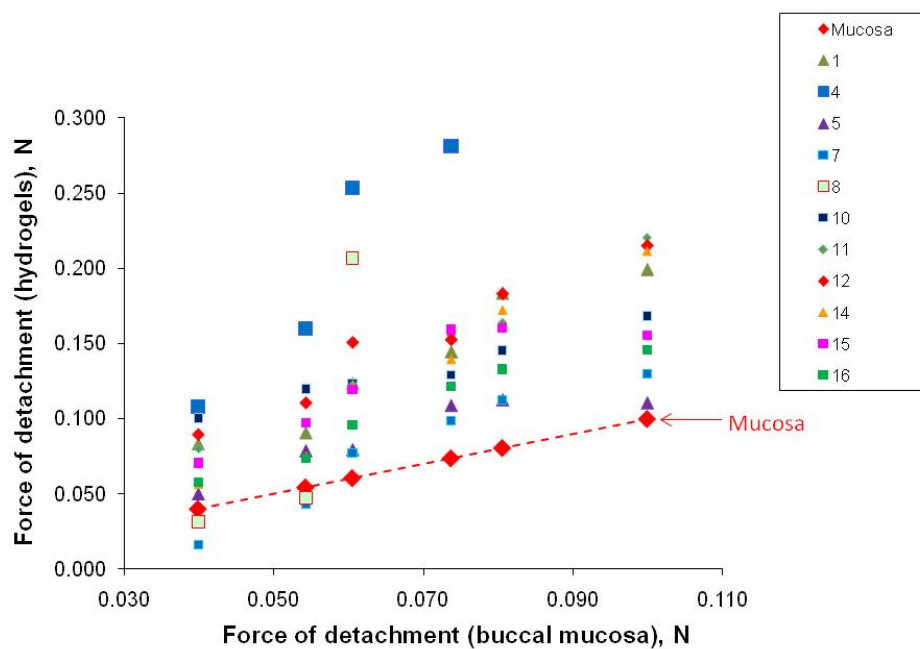

**Figure S3.** Correlation between  $F_{det}$  determined for detaching mucoadhesive tablets from synthetic hydrogels and from buccal mucosa (samples not included in Figure 1).

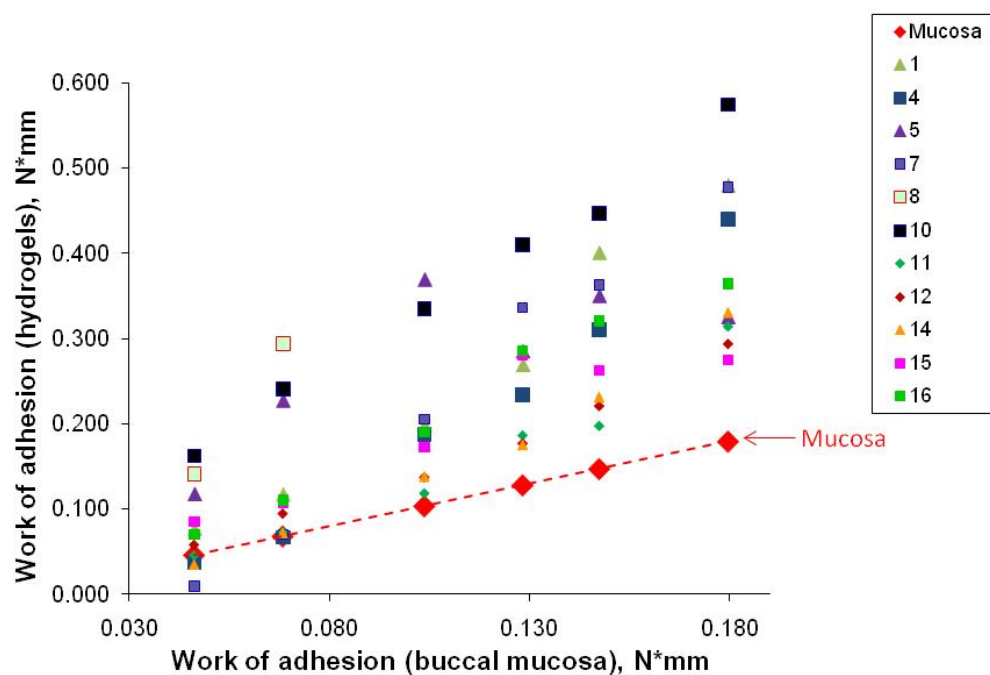

**Figure S4.** Correlation between  $W_{adh}$  determined for detaching mucoadhesive tablets from synthetic hydrogels and buccal mucosa (samples not included in Figure 2).

### Analysis of hydrogel water content

The equilibrium swelling degrees (ESDs) of hydrogels were determined by weighing the swollen samples with subsequent freeze-drying to obtain the weight of dry polymer. Each experiment on characterisation of swelling properties was repeated at least 3 times for every hydrogel and the ESDs were calculated as mean values  $\pm$  standard deviation using the following formula:

$$ESD = (W_s - W_d)/W_d,$$

where  $W_s$  and  $W_d$  are the weights of the swollen and dry sample, respectively.

### Ability of hydrogels with different degree of swelling to mimic mucosa

To establish the effect of hydrogels' swelling degree on their ability to mimic biological mucosa the work of adhesion difference ( $\Delta W_{adh}$ ) was calculated according to the following formula:

$$\Delta W_{adh} = W_{adh}(\text{hydrogel}) - W_{adh}(\text{mucosa})$$

This difference can be used as an indication of the ability of a hydrogel to mimic biological mucosa. Perfect mimicking properties are expected when  $\Delta W_{adh} = 0$ . The dependence of  $\Delta W_{adh}$  on hydrogels' ESD values is shown in Figure S5.

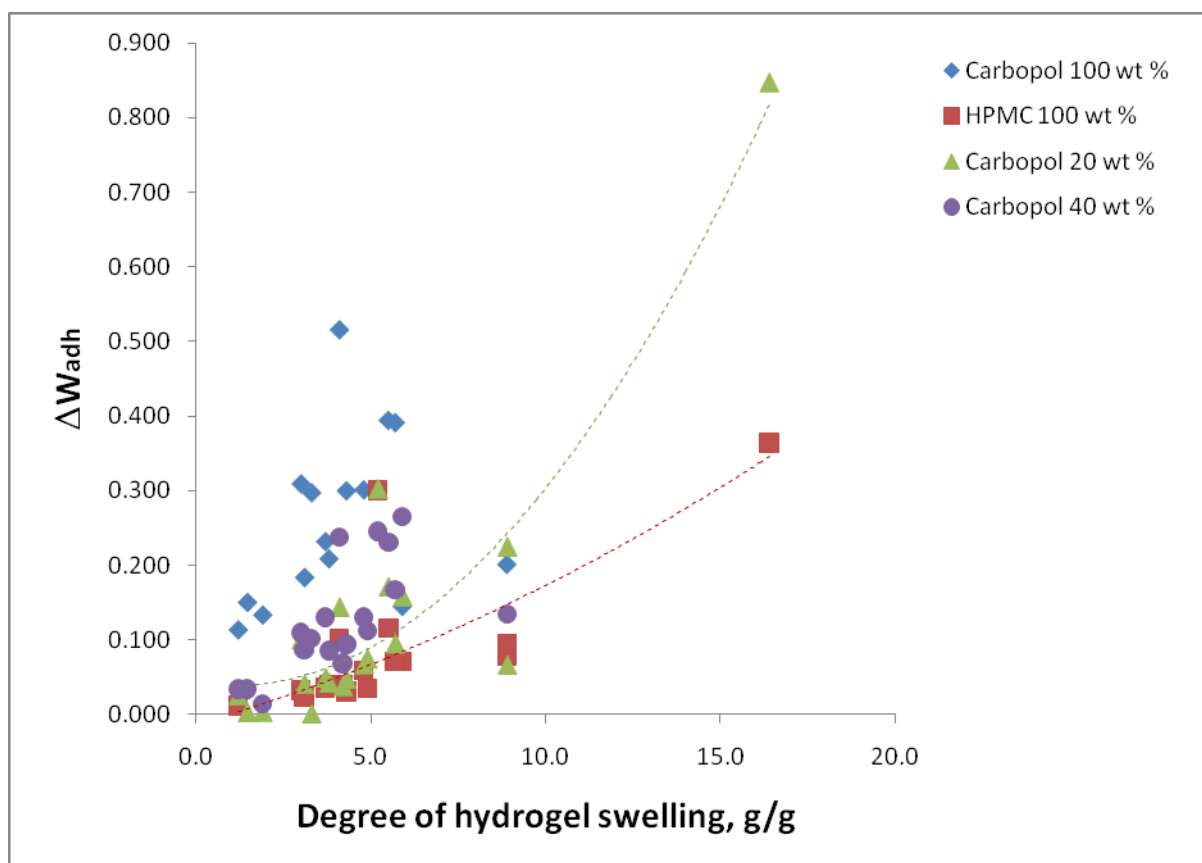

**Figure S5.** Work of adhesion difference ( $\Delta W_{adh}$ ) as a function of hydrogels' equilibrium swelling degree.

### References

1. T. Matsuda, T. Sugawara, *Macromolecules*, 1996, **29**, 5375.
